# Supplementary material for: Sol–gel fabrication and performance evaluation of graphene-based hydrophobic solid-phase microextraction fibers for multi-residue analysis of pesticides in water samples
Source: Royal Society of Chemistry journal article supplement (doi:10.1039/d0ay01153c), 2020-01-01
Supplement: d0ay01153c1.pdf [file d0ay01153c1.pdf]

**Sol-gel Fabrication and Performance Evaluation of Graphene-based  
Hydrophobic Solid-phase Microextraction Fibers for Multi-residue Analysis of  
Pesticides in Water Samples**

Jiixin Hu <sup>a,b</sup>, Cheng Qian <sup>a,b</sup>, Yinchenxi Zhang <sup>c</sup>, Yonghui Tian <sup>a,b,\*</sup>, Yixiang Duan <sup>a,b,\*</sup>

<sup>a</sup> *Research Center of Analytical Instrumentation, Northwest University, Xi'an, Shaanxi, 710069, China.*

<sup>b</sup> *Key Laboratory of Synthetic and Natural Functional Molecule Chemistry of Ministry of Education, College of Chemistry & Materials Science, Northwest University, Xi'an, Shaanxi, 710069, China*

<sup>c</sup> *Department of Physics, University of Oviedo, Oviedo, 33007, Spain*

\* Corresponding author:

Yixiang Duan

E-mail address: [yduan@nwu.edu.cn](mailto:yduan@nwu.edu.cn)

Yonghui Tian

E-mail address: [tyh2018@nwu.edu.cn](mailto:tyh2018@nwu.edu.cn)

Research Center of Analytical Instrumentation, Northwest University, 1 Xuefu Ave., Xi'an, 710075, Shaanxi Province, China

## Figure Captions

**Fig. S1** The representative GC chromatograms of the eight OPPs mixed standard solution by HS-SPME and Direct injection (DI). The solution used in HS-SPME was 1 mol L<sup>-1</sup> of mixed standard aqueous solution, and the solution used in DI was 2 mol L<sup>-1</sup> of mixed standard solutions. A. ethoprophos ( $t_R = 18.14$ ), B. sulfotep ( $t_R = 19.26$ ), C. cadusafos ( $t_R = 19.56$ ), D. phorate ( $t_R = 19.72$ ), E. terbufos ( $t_R = 21.50$ ), F. fonofos ( $t_R = 21.66$ ), G. chlorpyrifos ( $t_R = 24.70$ ), H. parathion ( $t_R = 24.95$ ).

**Fig. S2** The representative GC chromatograms of single standard sample solutions of eight OPPs (2 mol L<sup>-1</sup>) by Direct injection. A. ethoprophos ( $t_R = 17.85$ ), B. sulfotep ( $t_R = 19.08$ ), C. cadusafos ( $t_R = 19.58$ ), D. phorate ( $t_R = 19.69$ ), E. terbufos ( $t_R = 21.40$ ), F. fonofos ( $t_R = 21.50$ ), G. chlorpyrifos ( $t_R = 24.70$ ), H. parathion ( $t_R = 24.82$ ).

**Fig. S3** Effect of sample volume on extraction efficiency. A. ethoprophos, B. sulfotep, C. cadusafos, D. phorate, E. terbufos, F. fonofos, G. chlorpyrifos, H. parathion.

**Fig. S4** Optimization of extraction efficiency for the commercial PA fibers: (a) extraction temperature; (b) extraction time; (c) stirring speed. A. ethoprophos, B. sulfotep, C. cadusafos, D. phorate, E. terbufos, F. fonofos, G. chlorpyrifos, H. parathion.

**Fig. S5** Effect of ionic strength (a) and pH (b) on the extraction efficiency of eight prohibited or restricted OPPs by the commercial PA fibers. A. ethoprophos, B. sulfotep, C. cadusafos, D. phorate, E. terbufos, F. fonofos, G. chlorpyrifos, H. parathion.

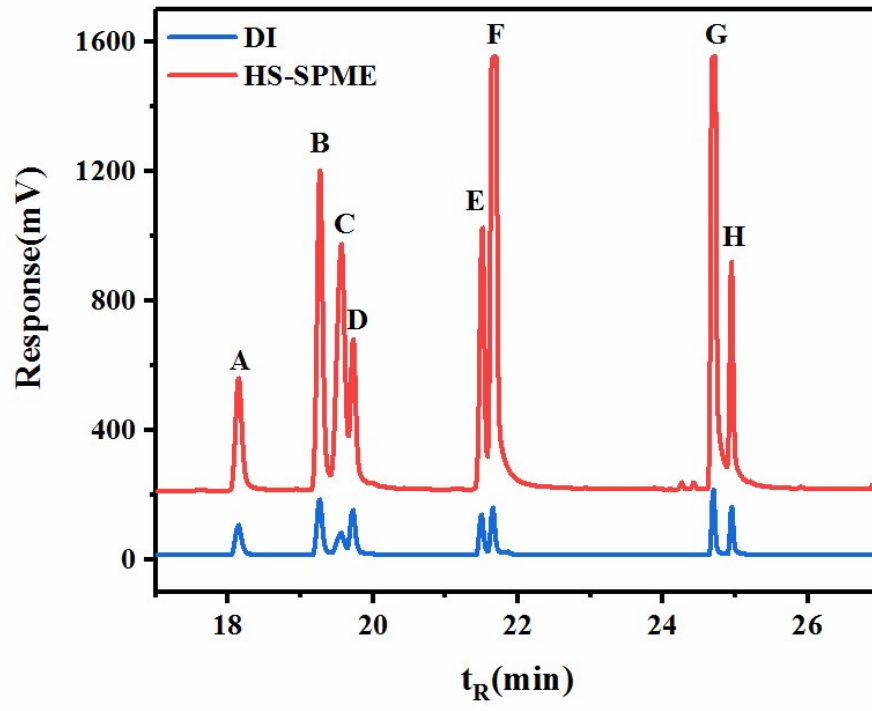

**Fig. S1**

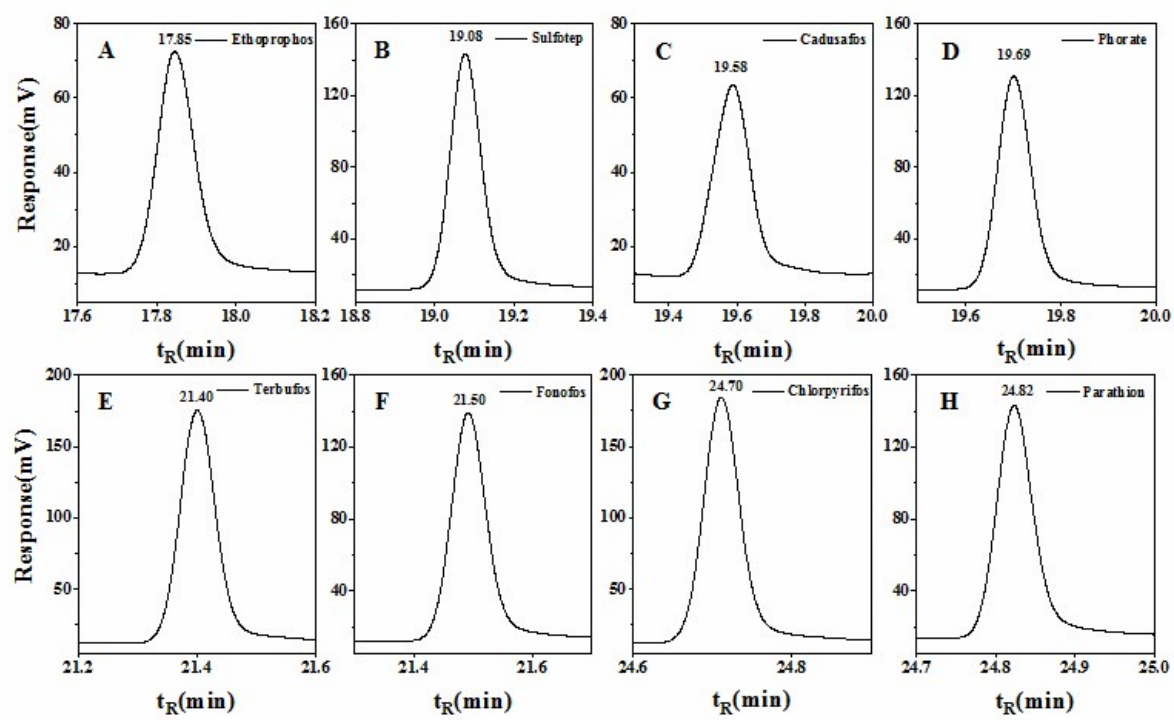

**Fig. S2**

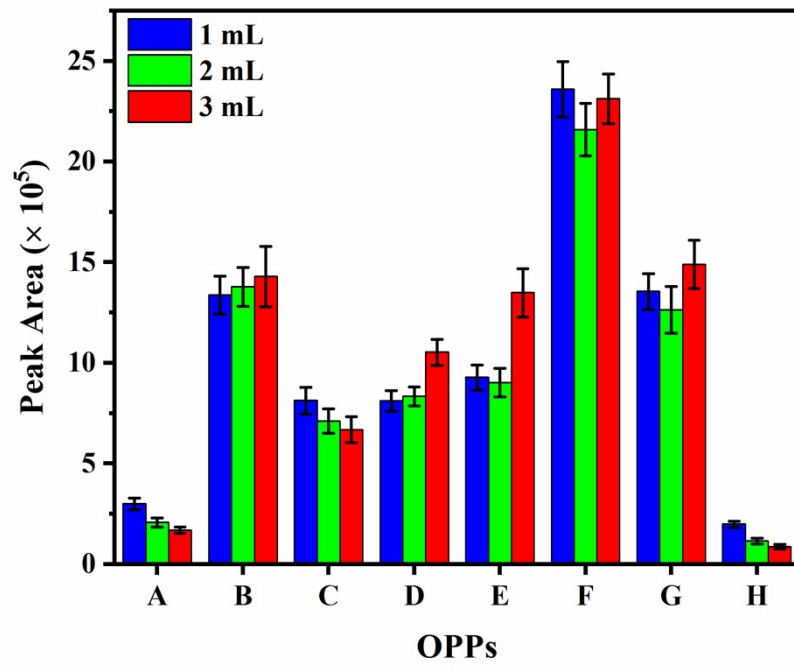

**Fig. S3**

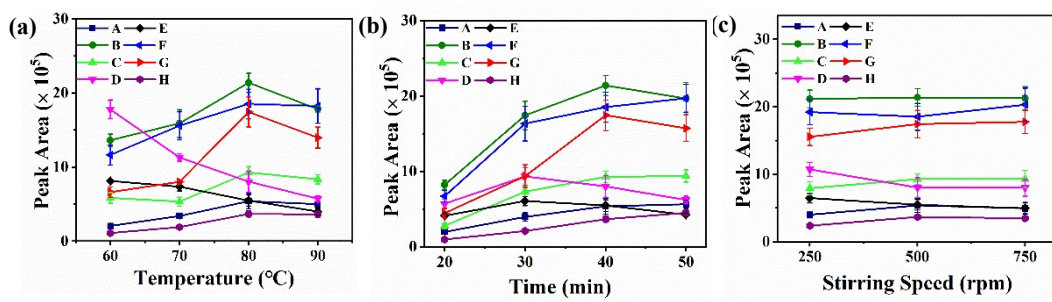

**Fig. S4**

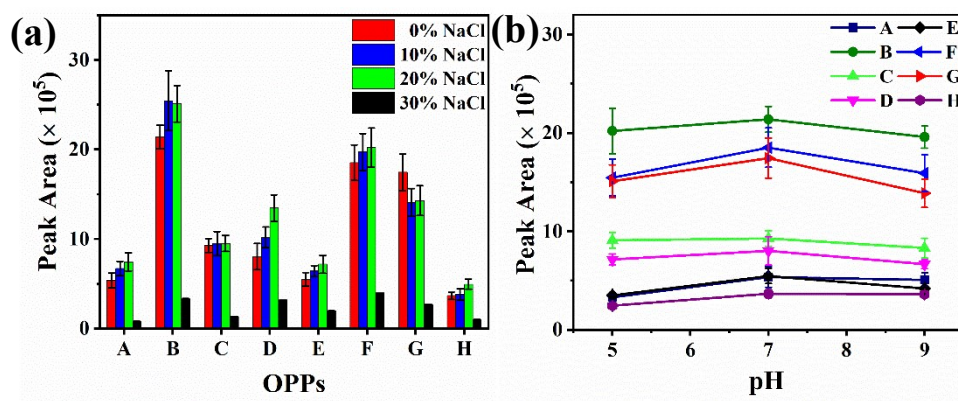

Fig. S5
